# Supplementary material for: Volunteering and instrumental support during the first phase of the pandemic in Europe: the significance of COVID-19 exposure and stringent country’s COVID-19 policy
Source: Springer Nature journal article supplement (doi:10.1186/s12889-023-17507-5), 2024-01-05
Supplement: MOESM1 [file 26600504]

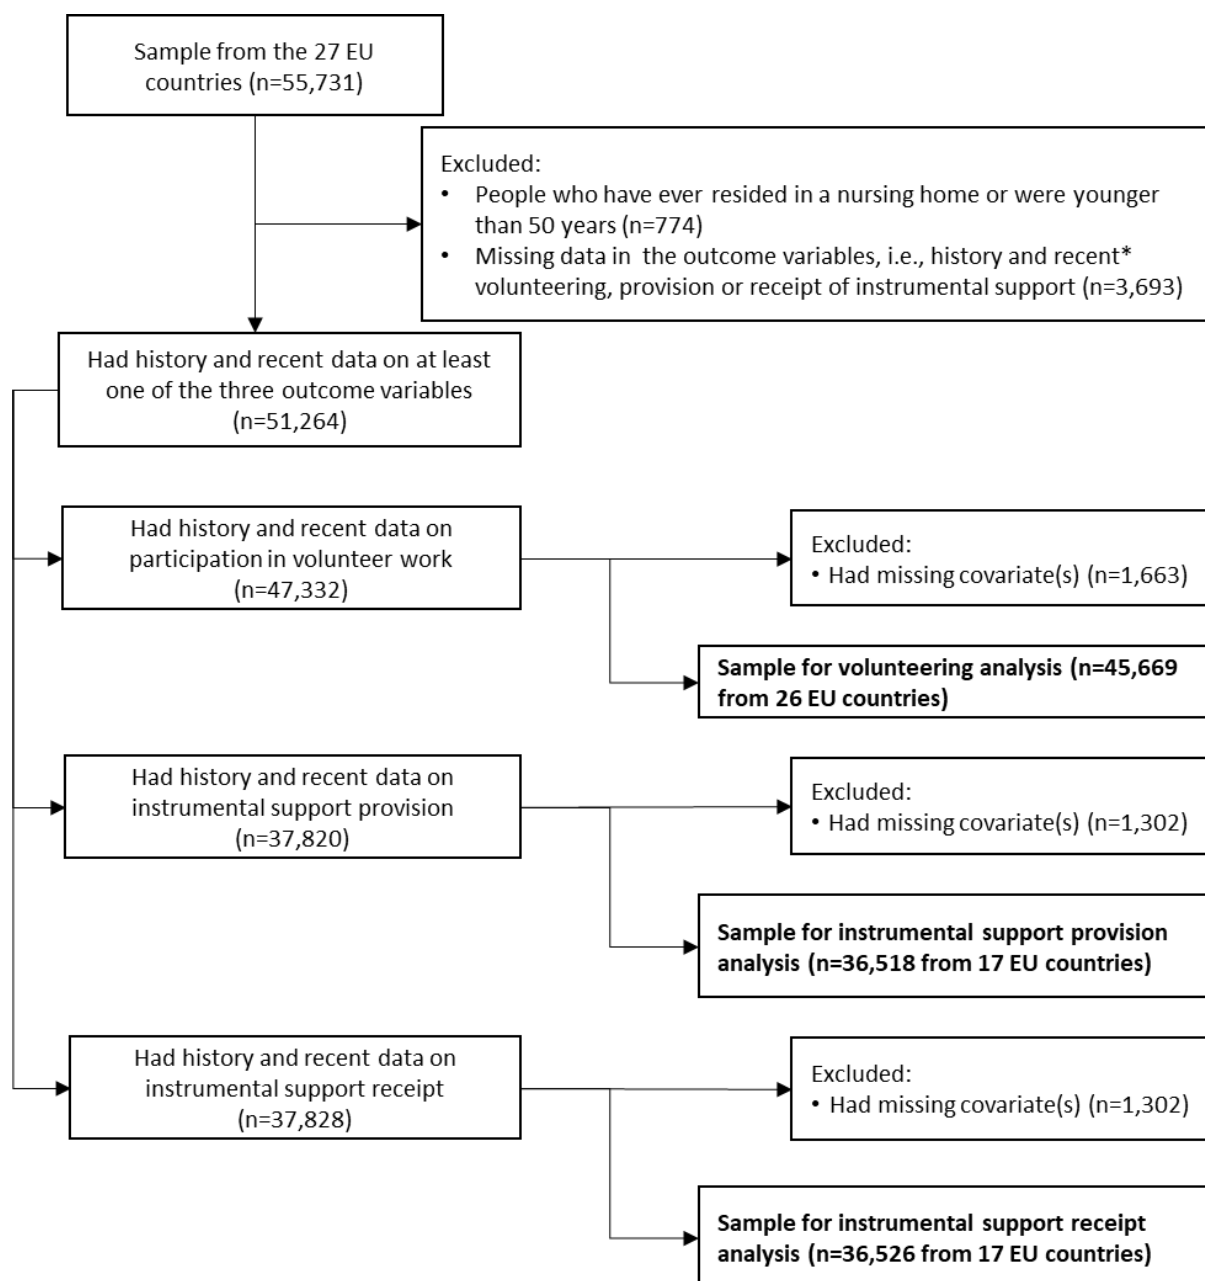

Note: SCS1 is SHARE Corona Survey 1

**Figure A1.** Study samples selection

**Table A1.** The country's COVID-19 control policy stringency index (S-Index), mean total COVID-19 per million people, and the levels of volunteering, providing instrumental support, and receiving instrumental support before the pandemic by country

| Country     | Sample for Volunteering analysis |                                       | Sample for providing instrumental support analysis |                                       | Sample for receiving instrumental support analysis |                                       | Volunteering (%) | Providing instrumental support (%) | Receiving instrumental support (%) |
|-------------|----------------------------------|---------------------------------------|----------------------------------------------------|---------------------------------------|----------------------------------------------------|---------------------------------------|------------------|------------------------------------|------------------------------------|
|             | S-Index                          | Mean total COVID-19 cases per million | S-Index                                            | Mean total COVID-19 cases per million | S-Index                                            | Mean total COVID-19 cases per million |                  |                                    |                                    |
| Austria     | 55.1                             | 3,371.1                               | 55.1                                               | 3,390.9                               | 55.1                                               | 3,390.9                               | 23.2             | 33.2                               | 26.8                               |
| Belgium     | 69.2                             | 5,533.9                               | 69.1                                               | 5,537.4                               | 69.1                                               | 5,537.4                               | 30.0             | 42.1                               | 18.2                               |
| Bulgaria    | 54.0                             | 1,721.7                               |                                                    |                                       |                                                    |                                       | 3.5              |                                    |                                    |
| Croatia     | 69.4                             | 1,009.4                               | 69.4                                               | 1,015.7                               | 69.4                                               | 1,015.9                               | 6.7              | 34.2                               | 28.5                               |
| Cyprus      | 73.1                             | 1,258.6                               |                                                    |                                       |                                                    |                                       | 14.6             |                                    |                                    |
| Czechia     | 55.8                             | 1,366.5                               | 55.8                                               | 1,367.4                               | 55.8                                               | 1,367.5                               | 9.2              | 39.9                               | 37.2                               |
| Denmark     | 64.6                             | 2,308.8                               | 64.6                                               | 2,309.7                               | 64.6                                               | 2,309.8                               | 36.7             | 57.8                               | 29.0                               |
| Estonia     | 55.2                             | 1,518.3                               | 55.1                                               | 1,519.4                               | 55.1                                               | 1,519.4                               | 11.2             | 24.3                               | 26.2                               |
| Finland     | <b>51.1</b>                      | 1,335.8                               |                                                    |                                       |                                                    |                                       | 27.6             |                                    |                                    |
| France      | <b>75.3</b>                      | 3,155.2                               | <b>75.3</b>                                        | 3,156.2                               | <b>75.3</b>                                        | 3,156.2                               | 27.5             | 39.5                               | 16.7                               |
| Germany     | 64.9                             | 2,414.5                               | 64.9                                               | 2,415.0                               | 64.9                                               | 2,415.0                               | 27.8             | 39.4                               | 23.6                               |
| Greece      | 65.4                             | 433.3                                 | 65.4                                               | <b>430.9</b>                          | 65.4                                               | <b>430.9</b>                          | 8.4              | 19.0                               | 17.9                               |
| Hungary     | 65.9                             | 448.9                                 |                                                    |                                       |                                                    |                                       | 9.0              |                                    |                                    |
| Italy       | 73.9                             | 4,029.9                               | 73.9                                               | 4,031.5                               | 73.9                                               | 4,031.5                               | 11.9             | 19.2                               | 12.0                               |
| Latvia      | 59.1                             | 648.1                                 |                                                    |                                       |                                                    |                                       | 7.7              |                                    |                                    |
| Lithuania   | 63.8                             | 692.3                                 |                                                    |                                       |                                                    |                                       | 5.7              |                                    |                                    |
| Luxembourg  | 55.0                             | <b>10,035.1</b>                       | <b>54.9</b>                                        | <b>10,042.3</b>                       | <b>54.9</b>                                        | <b>10,044.2</b>                       | 28.1             | 24.7                               | 11.4                               |
| Malta       | 67.4                             | 1,844.8                               |                                                    |                                       |                                                    |                                       | 17.8             |                                    |                                    |
| Poland      | 66.1                             | 1,071.2                               | 66.6                                               | 1,041.6                               | 66.6                                               | 1,041.6                               | 6.7              | 16.8                               | 12.1                               |
| Portugal    | 73.9                             | 4,700.2                               | 73.8                                               | 4,747.4                               | 73.8                                               | 4,747.4                               | 9.9              | 17.7                               | 10.1                               |
| Romania     | 69.7                             | 1,662.7                               |                                                    |                                       |                                                    |                                       | 3.9              |                                    |                                    |
| Slovakia    | 63.1                             | <b>356.4</b>                          |                                                    |                                       |                                                    |                                       | 8.2              |                                    |                                    |
| Slovenia    | 60.5                             | 883.5                                 | 60.4                                               | 886.3                                 | 60.4                                               | 886.3                                 | 13.0             | 23.0                               | 15.1                               |
| Spain       | 71.3                             | 5,601.8                               | 71.2                                               | 5,625.3                               | 71.2                                               | 5,625.1                               | 5.3              | 9.0                                | 10.6                               |
| Sweden      | 58.7                             | 7,204.6                               | 58.7                                               | 7,214.7                               | 58.7                                               | 7,214.7                               | 16.4             | 41.4                               | 19.5                               |
| Switzerland | 58.6                             | 3,793.9                               | 58.6                                               | 3,794.9                               | 58.6                                               | 3,795.0                               | 32.4             | 36.1                               | 17.3                               |

**Table A2.** Adjusted odds ratio (95% Confidence Interval) from multilevel logistic regression analysis of volunteering (N= 45,669)

|                                                    | Model 1: null model | Model 2:<br>+ control variables | Model 3: + COVID-19 exposure | Model 4: Country S-Index |
|----------------------------------------------------|---------------------|---------------------------------|------------------------------|--------------------------|
| Intercept                                          | 0.03***(0.02-0.05)  | 0.01***(0-0.01)                 | 0.01***(0-0.01)              | 0.01***(0-0.01)          |
| Covid-19 exposure on close ones                    |                     |                                 | 1.47***(1.31-1.65)           | 1.47***(1.32-1.65)       |
| Covid-19 exposure on respondents                   |                     |                                 | 0.95(0.73-1.23)              | 0.95(0.73-1.23)          |
| Country's standardised S-Index                     |                     |                                 |                              | 0.89(0.73-1.08)          |
| <i>Individual-level covariates</i>                 |                     |                                 |                              |                          |
| Woman                                              |                     | 0.87**(0.79-0.96)               | 0.87**(0.79-0.96)            | 0.87**(0.79-0.96)        |
| Age group                                          |                     |                                 |                              |                          |
| 50-59                                              |                     |                                 |                              |                          |
| 60-69                                              |                     | 1.11(0.95-1.31)                 | 1.12(0.95-1.32)              | 1.12(0.95-1.32)          |
| 70-79                                              |                     | 0.98(0.81-1.18)                 | 0.99(0.82-1.19)              | 0.99(0.82-1.19)          |
| 80+                                                |                     | 0.51*** (0.4-0.65)              | 0.53*** (0.42-0.67)          | 0.53*** (0.42-0.67)      |
| Educational level                                  |                     |                                 |                              |                          |
| Low                                                |                     |                                 |                              |                          |
| Middle                                             |                     | 1.16*(1.02-1.33)                | 1.15*(1.01-1.32)             | 1.15*(1.01-1.31)         |
| High                                               |                     | 1.61*** (1.4-1.84)              | 1.57*** (1.37-1.8)           | 1.57*** (1.37-1.8)       |
| Good household SES                                 |                     | 1.03(0.9-1.19)                  | 1.02(0.89-1.17)              | 1.02(0.89-1.17)          |
| Changes in employment status                       |                     |                                 |                              |                          |
| Unemployed                                         |                     |                                 |                              |                          |
| Became unemployed                                  |                     | 1.08(0.87-1.35)                 | 1.06(0.85-1.32)              | 1.06(0.85-1.32)          |
| Employed                                           |                     | 1.04(0.91-1.19)                 | 1.02(0.89-1.17)              | 1.02(0.89-1.16)          |
| Had volunteering history                           |                     | 5.06*** (4.6-5.58)              | 5.01*** (4.55-5.52)          | 5.01*** (4.55-5.52)      |
| Living alone                                       |                     | 1.07(0.96-1.2)                  | 1.08(0.97-1.21)              | 1.08(0.97-1.21)          |
| Had frequent direct/online contacts                |                     | 1.28*** (1.16-1.41)             | 1.28*** (1.16-1.42)          | 1.28*** (1.16-1.42)      |
| Had chronic condition before x during the pandemic |                     |                                 |                              |                          |
| No x No                                            |                     |                                 |                              |                          |
| No x Yes                                           |                     | 1.07(0.78-1.46)                 | 1.08(0.79-1.48)              | 1.08(0.79-1.48)          |
| Yes x No                                           |                     | 0.89*(0.8-0.99)                 | 0.89*(0.8-0.99)              | 0.89*(0.8-0.99)          |
| Yes x Yes                                          |                     | 0.77(0.57-1.02)                 | 0.77(0.57-1.02)              | 0.77(0.57-1.02)          |
| Self-rated health before x during the pandemic     |                     |                                 |                              |                          |
| Poor x Improved                                    |                     | 1.56*(1.09-2.24)                | 1.55*(1.09-2.23)             | 1.55*(1.09-2.23)         |
| Poor x Worsened                                    |                     | 1.12(0.82-1.53)                 | 1.11(0.81-1.52)              | 1.11(0.81-1.53)          |
| Poor x Same                                        |                     |                                 |                              |                          |

|                                               | Model 1: null model | Model 2:<br>+ control variables | Model 3: + COVID-19 exposure | Model 4: Country S-Index |
|-----------------------------------------------|---------------------|---------------------------------|------------------------------|--------------------------|
| Good x Improved                               |                     | 3.02***(2.25-4.04)              | 2.95***(2.2-3.96)            | 2.95***(2.2-3.96)        |
| Good x Worsened                               |                     | 1.75***(1.37-2.25)              | 1.73***(1.35-2.22)           | 1.73***(1.35-2.22)       |
| Good x Same                                   |                     | 1.61***(1.38-1.88)              | 1.61***(1.38-1.88)           | 1.62***(1.38-1.89)       |
| Feeling anxious                               |                     | 0.95(0.84-1.07)                 | 0.94(0.83-1.05)              | 0.94(0.83-1.06)          |
| Feeling sad or depressed                      |                     | 1.14*(1.01-1.3)                 | 1.13(1-1.29)                 | 1.14(1-1.29)             |
| Received home care before the pandemic        |                     | 0.84(0.63-1.12)                 | 0.85(0.64-1.13)              | 0.85(0.64-1.13)          |
| <i>Country-level covariates</i>               |                     |                                 |                              |                          |
| Level of volunteering before the pandemic     |                     | 1.04***(1.02-1.06)              | 1.04***(1.02-1.06)           | 1.04***(1.02-1.06)       |
| Standardised total COVID-19 cases per million |                     | 1.02(0.82-1.27)                 | 0.99(0.8-1.22)               | 0.99(0.8-1.22)           |
| Random intercept (country)                    | 2.21***(1.4-3.47)   | 1.25**(1.08-1.45)               | 1.25**(1.08-1.44)            | 1.23**(1.08-1.41)        |
| ICC                                           | 19.4%               | 6.4%                            | 6.3%                         | 5.9%                     |

**Table A3.** Adjusted odds ratio (95% Confidence Interval) from multilevel logistic regression analysis of instrumental support provision (N= 36,518)

|                                    | Model 1: null model | Model 2:<br>+ control variables | Model 3: + COVID-19 exposure | Model 4: Country S-Index |
|------------------------------------|---------------------|---------------------------------|------------------------------|--------------------------|
| Intercept                          | 0.18***(0.15-0.22)  | 0.08***(0.05-0.11)              | 0.07***(0.05-0.11)           | 0.07***(0.05-0.1)        |
| Covid-19 exposure on close ones    |                     |                                 | 1.28***(1.19-1.39)           | 1.28***(1.19-1.39)       |
| Covid-19 exposure on respondents   |                     |                                 | 0.94(0.78-1.13)              | 0.94(0.78-1.13)          |
| Country's standardised S-Index     |                     |                                 |                              | 1.13*(1.02-1.26)         |
| <i>Individual-level covariates</i> |                     |                                 |                              |                          |
| Woman                              |                     | 1.07(1-1.13)                    | 1.06(1-1.13)                 | 1.06(1-1.13)             |
| Age group                          |                     |                                 |                              |                          |
| 50-59                              |                     |                                 |                              |                          |
| 60-69                              |                     | 0.71***(0.64-0.77)              | 0.71***(0.64-0.77)           | 0.71***(0.64-0.77)       |
| 70-79                              |                     | 0.35***(0.31-0.39)              | 0.35***(0.31-0.39)           | 0.35***(0.31-0.39)       |
| 80+                                |                     | 0.18***(0.15-0.21)              | 0.18***(0.16-0.21)           | 0.18***(0.16-0.21)       |
| Educational level                  |                     |                                 |                              |                          |
| Low                                |                     |                                 |                              |                          |
| Middle                             |                     | 1.31***(1.2-1.42)               | 1.3***(1.2-1.41)             | 1.31***(1.21-1.42)       |
| High                               |                     | 1.42***(1.3-1.55)               | 1.4***(1.28-1.53)            | 1.41***(1.29-1.54)       |

Volunteering and instrumental support during the first phase of the pandemic in Europe: The significance of COVID-19 exposure and stringent country's COVID-19 policy

|                                                             | Model 1: null model | Model 2:<br>+ control variables | Model 3: + COVID-19 exposure | Model 4: Country S-Index |
|-------------------------------------------------------------|---------------------|---------------------------------|------------------------------|--------------------------|
| Good household SES                                          |                     | 1.12**(1.03-1.21)               | 1.11*(1.02-1.2)              | 1.11*(1.02-1.21)         |
| Changes in employment status                                |                     |                                 |                              |                          |
| Unemployed                                                  |                     |                                 |                              |                          |
| Became unemployed                                           |                     | 1.43***(1.26-1.63)              | 1.42***(1.24-1.62)           | 1.42***(1.24-1.62)       |
| Employed                                                    |                     | 1.21***(1.11-1.32)              | 1.2***(1.1-1.3)              | 1.20***(1.10-1.30)       |
| Had instrumental support provision history                  |                     | 1.78***(1.67-1.9)               | 1.77***(1.66-1.89)           | 1.77***(1.66-1.89)       |
| Living alone                                                |                     | 1.17***(1.09-1.27)              | 1.18***(1.1-1.27)            | 1.18***(1.10-1.28)       |
| Had frequent direct/online contacts                         |                     | 1.76***(1.64-1.88)              | 1.76***(1.65-1.88)           | 1.76***(1.65-1.88)       |
| Had chronic condition before x during the pandemic          |                     |                                 |                              |                          |
| No x No                                                     |                     |                                 |                              |                          |
| No x Yes                                                    |                     | 0.74*(0.59-0.95)                | 0.75*(0.59-0.95)             | 0.75*(0.59-0.95)         |
| Yes x No                                                    |                     | 0.88***(0.82-0.94)              | 0.88***(0.82-0.94)           | 0.88***(0.82-0.95)       |
| Yes x Yes                                                   |                     | 0.77***(0.64-0.93)              | 0.77***(0.64-0.94)           | 0.77***(0.64-0.94)       |
| Self-rated health before x during the pandemic              |                     |                                 |                              |                          |
| Poor x Improved                                             |                     | 1.11(0.86-1.42)                 | 1.1(0.86-1.41)               | 1.1(0.86-1.42)           |
| Poor x Worsened                                             |                     | 0.91(0.75-1.1)                  | 0.91(0.75-1.1)               | 0.91(0.75-1.1)           |
| Poor x Same                                                 |                     |                                 |                              |                          |
| Good x Improved                                             |                     | 1.7***(1.35-2.14)               | 1.67***(1.33-2.11)           | 1.67***(1.33-2.11)       |
| Good x Worsened                                             |                     | 1.47***(1.24-1.74)              | 1.46***(1.23-1.73)           | 1.46***(1.23-1.73)       |
| Good x Same                                                 |                     | 1.38***(1.26-1.51)              | 1.38***(1.26-1.51)           | 1.38***(1.26-1.51)       |
| Feeling anxious                                             |                     | 1.16***(1.07-1.25)              | 1.15***(1.07-1.24)           | 1.15***(1.06-1.24)       |
| Feeling sad or depressed                                    |                     | 1.05(0.97-1.14)                 | 1.05(0.96-1.14)              | 1.05(0.96-1.14)          |
| Received home care before the pandemic                      |                     | 0.74***(0.61-0.91)              | 0.75***(0.61-0.92)           | 0.75***(0.61-0.91)       |
| <i>Country-level covariates</i>                             |                     |                                 |                              |                          |
| Level of instrumental support provision before the pandemic |                     | 1.01*(1-1.02)                   | 1.01*(1-1.02)                | 1.01***(1-1.02)          |
| Standardised total COVID-19 cases per million               |                     | 1.26***(1.12-1.42)              | 1.23***(1.09-1.39)           | 1.24***(1.11-1.38)       |
| <i>Random intercept (country)</i>                           | 1.2***(1.06-1.35)   | 1.06***(1.02-1.1)               | 1.05***(1.01-1.1)            | 1.04***(1.01-1.07)       |
| ICC                                                         | 5.1%                | 1.6%                            | 1.6%                         | 1.2%                     |

**Table A4.** Adjusted odds ratio (95% Confidence Interval) from multilevel logistic regression analysis of instrumental support receipt (N= 36,526)

| Receiving instrumental support                     | Model 1: null model | Model 2:<br>+ control variables | Model 3: + COVID-19 exposure | Model 4: Country S-Index |
|----------------------------------------------------|---------------------|---------------------------------|------------------------------|--------------------------|
| Intercept                                          | 0.4***(0.32-0.5)    | 0.04***(0.02-0.08)              | 0.04***(0.02-0.08)           | 0.06***(0.03-0.13)       |
| Covid-19 exposure on close ones                    |                     |                                 | 1.25***(1.15-1.35)           | 1.25***(1.15-1.35)       |
| Covid-19 exposure on respondents                   |                     |                                 | 1.64***(1.38-1.95)           | 1.64***(1.38-1.95)       |
| Country's standardised S-Index                     |                     |                                 |                              | 0.69**(0.54-0.88)        |
| <i>Individual-level covariates</i>                 |                     |                                 |                              |                          |
| Woman                                              |                     | 1.55***(1.47-1.64)              | 1.55***(1.46-1.64)           | 1.55***(1.46-1.64)       |
| Age group                                          |                     |                                 |                              |                          |
| 50-59                                              |                     |                                 |                              |                          |
| 60-69                                              |                     | 2.13***(1.82-2.48)              | 2.13***(1.83-2.49)           | 2.13***(1.83-2.48)       |
| 70-79                                              |                     | 4.66***(3.99-5.45)              | 4.74***(4.05-5.54)           | 4.73***(4.05-5.53)       |
| 80+                                                |                     | 8.57***(7.28-10.08)             | 8.79***(7.47-10.34)          | 8.78***(7.46-10.33)      |
| Educational level                                  |                     |                                 |                              |                          |
| Low                                                |                     |                                 |                              |                          |
| Middle                                             |                     | 0.86***(0.81-0.92)              | 0.86***(0.8-0.92)            | 0.86***(0.8-0.92)        |
| High                                               |                     | 0.79***(0.73-0.85)              | 0.77***(0.72-0.84)           | 0.77***(0.72-0.84)       |
| Good household SES                                 |                     | 1.03(0.96-1.1)                  | 1.02(0.95-1.1)               | 1.02(0.95-1.09)          |
| Changes in employment status                       |                     |                                 |                              |                          |
| Unemployed                                         |                     |                                 |                              |                          |
| Became unemployed                                  |                     | 0.59***(0.49-0.71)              | 0.57***(0.48-0.69)           | 0.57***(0.48-0.69)       |
| Employed                                           |                     | 0.49***(0.43-0.54)              | 0.48***(0.42-0.53)           | 0.47***(0.42-0.53)       |
| Had instrumental support receipt history           |                     | 1.32***(1.23-1.4)               | 1.32***(1.23-1.4)            | 1.32***(1.23-1.4)        |
| Living alone                                       |                     | 1.51***(1.42-1.6)               | 1.52***(1.43-1.61)           | 1.52***(1.43-1.61)       |
| Had frequent direct/online contacts                |                     | 1.49***(1.41-1.58)              | 1.5***(1.42-1.58)            | 1.5***(1.42-1.58)        |
| Had chronic condition before x during the pandemic |                     |                                 |                              |                          |
| No x No                                            |                     |                                 |                              |                          |
| No x Yes                                           |                     | 1.27*(1.06-1.52)                | 1.27*(1.06-1.53)             | 1.27*(1.06-1.53)         |
| Yes x No                                           |                     | 1.15***(1.08-1.22)              | 1.15***(1.08-1.21)           | 1.15***(1.08-1.21)       |
| Yes x Yes                                          |                     | 1.52***(1.34-1.73)              | 1.51***(1.33-1.72)           | 1.51***(1.33-1.72)       |
| Self-rated health before x during the pandemic     |                     |                                 |                              |                          |
| Poor x Improved                                    |                     | 1.16(0.96-1.41)                 | 1.13(0.93-1.37)              | 1.13(0.93-1.37)          |
| Poor x Worsened                                    |                     | 1.1(0.98-1.23)                  | 1.09(0.97-1.22)              | 1.09(0.97-1.22)          |

Volunteering and instrumental support during the first phase of the pandemic in Europe: The significance of COVID-19 exposure and stringent country's COVID-19 policy

| Receiving instrumental support                            | Model 1: null model | Model 2:<br>+ control variables | Model 3: + COVID-19 exposure | Model 4: Country S-Index |
|-----------------------------------------------------------|---------------------|---------------------------------|------------------------------|--------------------------|
| Poor x Same                                               |                     |                                 |                              |                          |
| Good x Improved                                           |                     | 0.73**(0.57-0.92)               | 0.71**(0.56-0.91)            | 0.71**(0.56-0.91)        |
| Good x Worsened                                           |                     | 1.04(0.91-1.2)                  | 1.01(0.87-1.16)              | 1.01(0.88-1.16)          |
| Good x Same                                               |                     | 0.69*** (0.64-0.73)             | 0.69*** (0.65-0.74)          | 0.69*** (0.65-0.74)      |
| Feeling anxious                                           |                     | 1.33*** (1.25-1.42)             | 1.32*** (1.24-1.41)          | 1.32*** (1.24-1.41)      |
| Feeling sad or depressed                                  |                     | 1.27*** (1.18-1.35)             | 1.26*** (1.18-1.35)          | 1.26*** (1.18-1.35)      |
| Received home care before the pandemic                    |                     | 3.44*** (3.06-3.87)             | 3.46*** (3.08-3.89)          | 3.46*** (3.08-3.9)       |
| <i>Country-level covariates</i>                           |                     |                                 |                              |                          |
| Level of instrumental support receipt before the pandemic |                     | 1.02(0.99-1.06)                 | 1.02(0.99-1.06)              | 0.99(0.96-1.03)          |
| Standardised total COVID-19 cases per million             |                     | 1.32(1-1.76)                    | 1.29(0.97-1.72)              | 1.14(0.89-1.45)          |
| <i>Random intercept (country)</i>                         | 1.24** (1.07-1.43)  | 1.3** (1.09-1.55)               | 1.3** (1.09-1.56)            | 1.19** (1.06-1.34)       |
| <i>ICC</i>                                                | 6.0%                | 7.4%                            | 7.5%                         | 5.0%                     |
